# Supplementary material for: Eccentric 1-D magnetic core–shell photonic crystal balls: ingenious fabrication and distinctive optical properties
Source: Royal Society of Chemistry journal article supplement (doi:10.1039/c8tc00640g), 2018-01-01
Supplement: c8tc00640g1.pdf [file c8tc00640g1.pdf]

Supporting Information

**Eccentric 1-D Magnetic Core-Shell Photonic Crystal Balls: Ingenious Fabrication and Distinctive Optical Properties**

Huiru Ma<sup>a,b</sup>, Yali Tan<sup>a</sup>, Jie Cao<sup>a</sup>, Sheron Chuanyu Lian<sup>a</sup>, Ke Chen<sup>b</sup>, Wei Luo<sup>a</sup>, and Jianguo Guan<sup>\*a</sup>

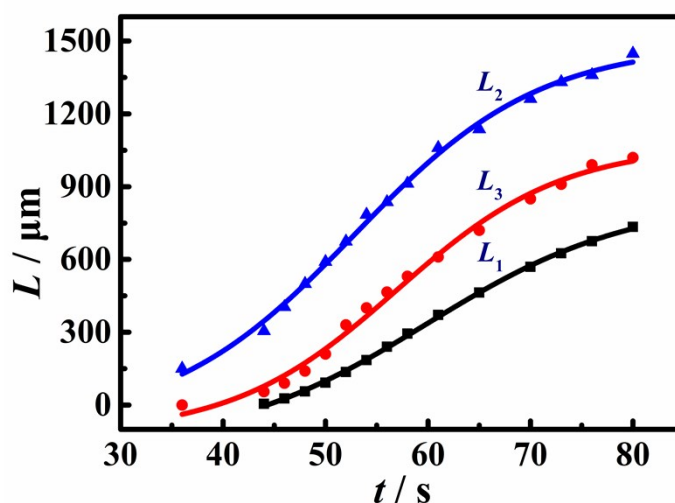

Fig. S1 The change of shell thickness  $L_1$ ,  $L_2$  and  $L_3$  with the UV light irradiation time ( $t$ ).

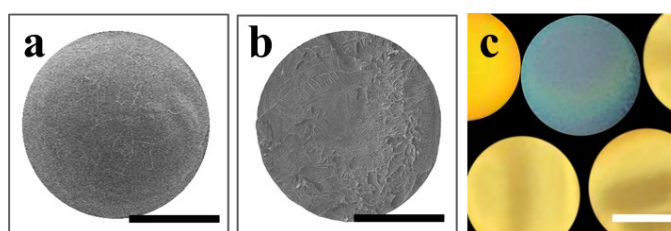

Fig. S2 SEM images of (a) the sample obtained at  $t$  of 82 s and (b) its corresponding central cross-section along the direction incident light, indicating that the droplet template was completely polymerized into a solid ball. (c) Digital photo, indicating that the completely polymerized PCB sample dispersed in water displays various colors, suggesting that they cannot be self-oriented along the magnetic nanochain structures. The bars are all 2 mm.

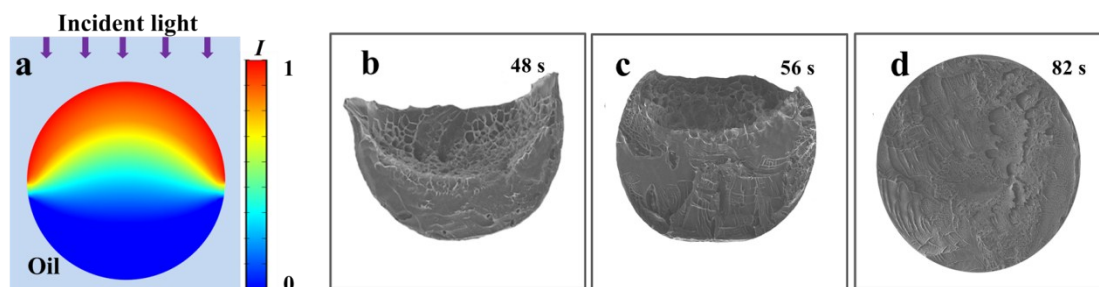

**Fig. S3** (a) Simulated time-averaged energy distribution in a droplet template dispersed in a container with black bottom when it was radiated by a beam of UV light from the top; (b-d) SEM images of the central cross-sectional samples along the incident light direction, which are obtained at different  $t$ .

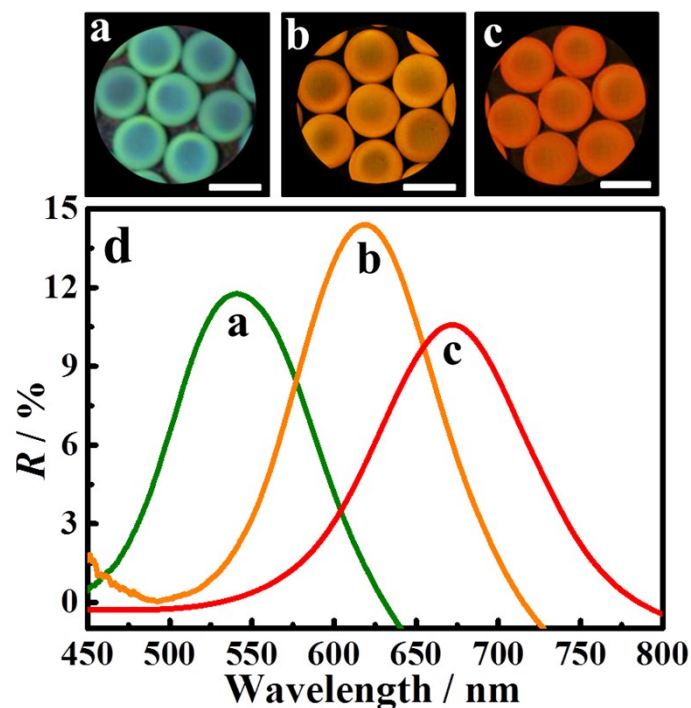

**Fig. S4** (a-c) Digital photos of the eccentric 1-D magnetic core-shell PCBs prepared under different  $H$  of (a) 550 Gs, (b) 400 Gs and (c) 300 Gs, and (d) the corresponding reflection spectra. The bars are 2 mm.

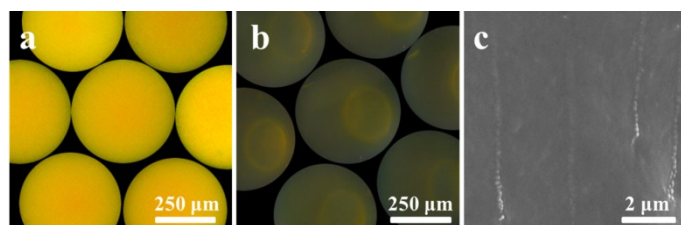

**Fig. S5** Eccentric 1-D magnetic core-shell PCBs with a size of micrometers prepared under  $H$  of 550 Gs: (a) digital photo for them without  $H$ , (b) digital photo for them under  $H$  vertical to the observation direction and (c) SEM image of a cross-section zone in outer shell.

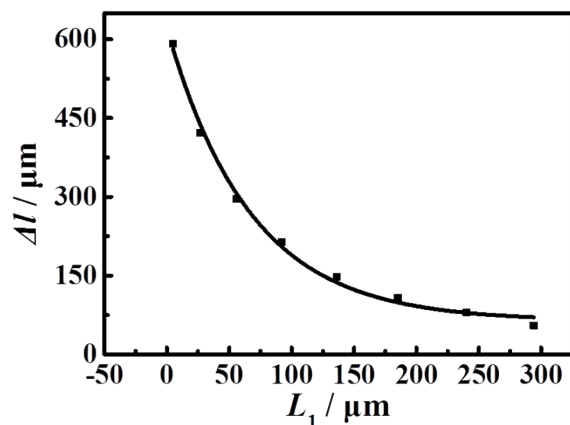

Fig. S6 Changes of the distance between the geometric center and the mass center ( $\Delta l$ ) with shell thickness  $L_1$ .

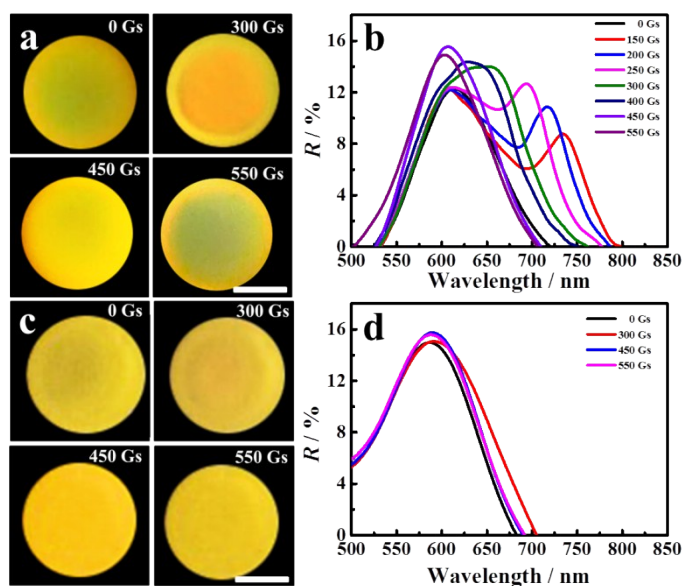

Fig. S7 (a, c) Digital photos and (b, d) reflection spectra of the eccentric 1-D magnetic core-shell PCBs with shell thickness  $L_1$  of (a, b)  $56 \mu\text{m}$  and (c, d)  $136 \mu\text{m}$  under different  $H$ , of which the direction is parallel to both the magnetic nanochain structures within the PCBs and the observed direction. The scale bars are  $1.0 \text{ mm}$ .

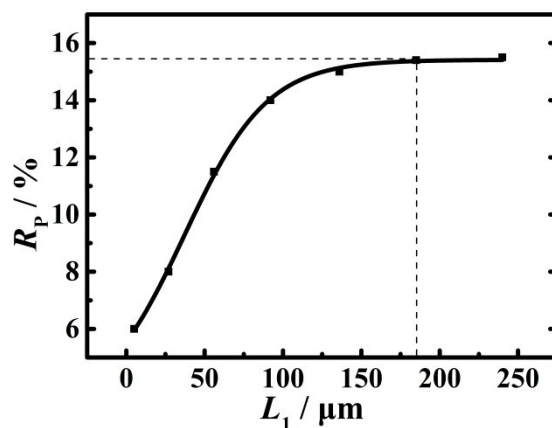

**Fig. S8** The relationship between the maximum of diffraction peak ( $R_p$ ) and shell thickness  $L_1$  for the eccentric 1-D magnetic core-shell PCBs without  $H$ , where the observed direction is parallel to the magnetic nanochain structures within the PCBs.

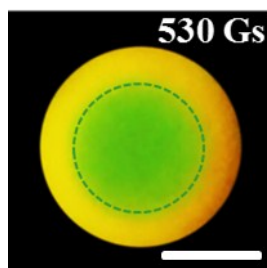

**Fig. S9** Digital photo of an eccentric 1-D magnetic core-shell PCB, which are obtained after optimizing the synthetic condition, and under the application of 530 Gs external magnetic field. The scale bar is 1.0 mm.

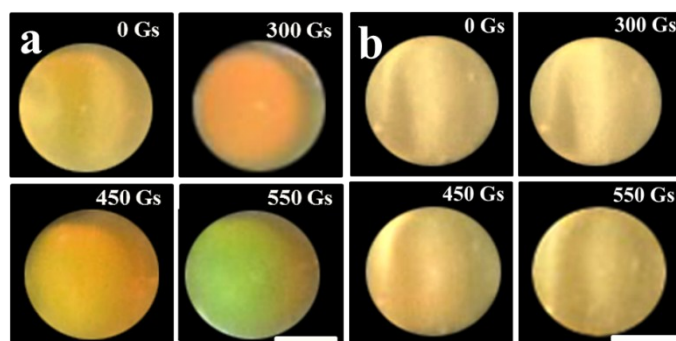

**Fig. S10** Digital photos of the eccentric 1-D magnetic core-shell PCBs with  $L_3$  of (a) 140  $\mu\text{m}$  and (b) 300  $\mu\text{m}$  fixed in viscous oil under different  $H$ , of which the direction is vertical to the 1-D magnetic particle chain-like structures in the PC hydrogel shell and parallel to the observation direction. The scale bars are 1.0 mm.

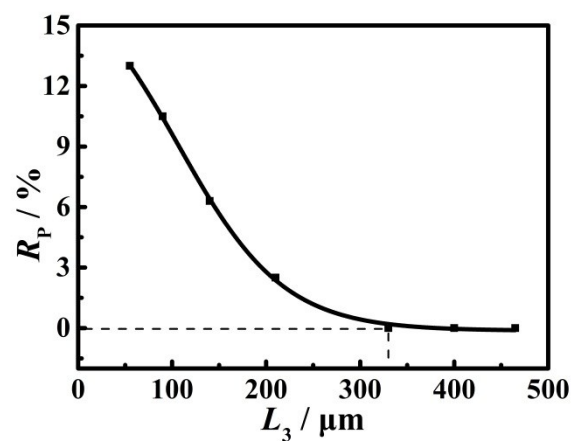

**Fig. S11**  $R_p$  versus shell thickness  $L_3$  for the eccentric 1-D magnetic core-shell PCBs fixed in viscous oil under  $H = 450$  Gs, of which the direction is vertical to the magnetic nanochain structures within the PCBs and parallel to the observed direction.
